# Supplementary material for: Quantifying memory and persistence in the atmosphere–land/ocean carbon system
Source: Copernicus journal article supplement (doi:10.5194/esd-2021-27), 2021-07-01
Supplement: Supplementary file 1 [file esd-2021-27-supplement.pdf]

## Supplementary Information (SI)

### SI1: To equation (2)

With  $\dot{\varepsilon}(t) = \alpha \exp(\alpha t)$  and  $\alpha > 0$ ,  $\sigma(0) = 0$  and  $\beta = 1 + \alpha \frac{D}{K}$ :

$$\begin{aligned}\sigma(t) &= K \int_0^t \alpha \exp(\alpha \tau) \exp\left(\frac{K}{D}(\tau - t)\right) d\tau = K \alpha \exp\left(-\frac{K}{D}t\right) \int_0^t \exp\left(\frac{K}{D}\beta \tau\right) d\tau \\ &= \frac{D}{\beta} \alpha \exp\left(-\frac{K}{D}t\right) \left(\exp\left(\frac{K}{D}\beta t\right) - 1\right) = \frac{D}{\beta} \alpha \exp(\alpha t) \left(1 - \exp\left(-\frac{K}{D}\beta t\right)\right) \\ &= \frac{D}{\beta} \dot{\varepsilon}(t) (1 - q_\beta^t)\end{aligned}$$

where  $q_\beta^t = \exp\left(-\frac{K}{D}\beta t\right)$ . Introducing the dimensionless time  $n = \frac{t}{\Delta t}$  (where  $\Delta t = 1y$ ), equation (2) takes the form

$$\sigma(n) = \frac{D}{\beta} \frac{\alpha_n}{\Delta t} \exp(\alpha_n n) (1 - q_\beta^n) = \frac{D}{\beta} \dot{\varepsilon}(n) (1 - q_\beta^n) \quad (\text{SI1-1})$$

where  $\alpha_n := \alpha \Delta t$ ,  $q_\beta = q_\alpha q$ ,  $q_\alpha = \exp(-\alpha \Delta t)$ ,  $q = \exp\left(-\frac{K}{D} \Delta t\right)$ , and  $q_\beta^t = \left(\exp\left(-\frac{K}{D}\beta \Delta t\right)\right)^n$ .

### SI2: To equation (3)

We start from equation (2b) in the form  $\sigma_D(q, n) := \frac{1}{D} \sigma(n) = \dot{\varepsilon}(n) \frac{\ln q}{\ln q - \alpha_n} (1 - q_\alpha^n q^n)$  with

$$\frac{1}{\beta} = \frac{\ln q}{\ln q - \alpha_n}:$$

$$\begin{aligned}q \frac{\partial}{\partial q} \sigma_D(q, n) &= \dot{\varepsilon}(n) q \left\{ \frac{\partial}{\partial q} \left( \frac{\ln q}{\ln q - \alpha_n} \right) (1 - q_\beta^n) - \frac{\ln q}{\ln q - \alpha_n} q_\alpha^n \frac{\partial}{\partial q} q^n \right\} \\ &= \dot{\varepsilon}(n) \left\{ q \frac{\partial}{\partial q} \left( \frac{\ln q}{\ln q - \alpha_n} \right) (1 - q_\beta^n) - \frac{1}{\beta} q_\beta^n n \right\}\end{aligned} \quad (\text{SI2-1a})$$

where we can avoid the effort of writing out the 1<sup>st</sup> derivative on the right side; and

$$q q_\alpha^n \frac{\partial}{\partial q} q^n = q q_\alpha^n q^{n-1} n = q_\beta^n n.$$

On the other hand, with  $S_n = \frac{1-q_\beta^n}{1-q_\beta}$  and the help of equation (SI3-4a):

$$\begin{aligned}
 q \frac{\partial}{\partial q} \sigma_D(q, n) &= \dot{\varepsilon}(n) q \frac{\partial}{\partial q} \left( \frac{\ln q}{\ln q - \alpha_n} (1 - q_\beta) S_n \right) \\
 &= \dot{\varepsilon}(n) q \left\{ \frac{\partial}{\partial q} \left( \frac{\ln q}{\ln q - \alpha_n} \right) (1 - q_\beta) S_n - \frac{1}{\beta} \frac{\partial q_\beta}{\partial q} S_n + \frac{1}{\beta} (1 - q_\beta) \frac{\partial q_\beta}{\partial q} \frac{\partial S_n}{\partial q_\beta} \right\} \\
 &= \dot{\varepsilon}(n) \left\{ q \frac{\partial}{\partial q} \left( \frac{\ln q}{\ln q - \alpha_n} \right) (1 - q_\beta) S_n - \frac{1}{\beta} q_\beta S_n + \frac{1}{\beta} (1 - q_\beta) S_n \frac{q_\beta}{S_n} \frac{\partial S_n}{\partial q_\beta} \right\} \\
 &= \dot{\varepsilon}(n) \left\{ q \frac{\partial}{\partial q} \left( \frac{\ln q}{\ln q - \alpha_n} \right) (1 - q_\beta^n) - \frac{1}{\beta} q_\beta S_n + \frac{1}{\beta} (1 - q_\beta^n) T \right\}
 \end{aligned} \tag{SI2-1b}$$

Balancing equations (SI2-1a) and (SI2-1b) yields equation (3):

$$T = -\frac{q_\beta^n}{1-q_\beta^n} n + \frac{q_\beta}{1-q_\beta}. \tag{SI2-2}$$

### SI3: Justifying T as delay time

We can let any function  $f$  of time  $t$  (dimensionless throughout SI3 and  $\in \mathbb{N}_0$  without restricting generality) depend increasingly on previous times by applying the approach of a simple weighted average and a weighting fading away exponentially backward in time ( $q < 1$ ):

$$\begin{aligned}
 y_1(t) &= f\left(\frac{q^0 t}{q^0}\right) \\
 y_2(t) &= f\left(\frac{q^0 t + q^1(t-1)}{q^0 + q^1}\right) \\
 &\dots \\
 y_k(t) &= f\left(\frac{q^0 t + q^1(t-1) + q^2(t-2) + \dots + q^{k-1}(t-(k-1))}{\sum_{i=0}^{k-1} q^i}\right) = f(t - T)
 \end{aligned} \tag{SI3-1}$$

( $t \geq k \in \mathbb{N}_0$ ) with  $T$  appearing as delay time in the argument of the function  $f$ . The denominator of the argument in the middle is given by

$$S_k = \sum_{i=0}^{k-1} q^i = \frac{1-q^k}{1-q}; \quad (\text{SI3-2})$$

while the numerator can be transformed with the help of<sup>1</sup>

$$\sum_{k=a}^{b-1} k^m z^k = \left( z \frac{d}{dz} \right)^m \frac{z^b - z^a}{z-1} \quad (z \neq 1),$$

here with  $i$  instead of  $k$ , and  $q$  instead of  $z$ , and  $a=0$ ,  $b=k$ , and  $m=1$

$$\sum_{i=0}^{k-1} i q^i = q \frac{d}{dq} \frac{q^k - q^0}{q-1} = q \frac{d}{dq} \frac{1-q^k}{1-q} = q \frac{d}{dq} S_k \quad (q \neq 1) \quad (\text{SI3-3})$$

to derive  $T$ :

$$T = \frac{q}{S_k} \frac{d}{dq} S_k. \quad (\text{SI3-4a})$$

Similar to and in accordance with equation (3), carrying out the derivation by  $q$  on the right side yields

$$T = \frac{q}{S_k} \frac{1}{1-q} (-q^k k + S_k) = -\frac{q^k}{1-q^k} k + \frac{q}{1-q}. \quad (\text{SI3-4b})$$

It is straightforward to show by applying l'Hospital that  $\lim_{k \rightarrow \infty} (q^k k) = 0$ . Thus:

$$T_{k \rightarrow \infty} (= T_\infty) = \frac{q}{1-q} = q \frac{1}{1-q} = q S_{k \rightarrow \infty}. \quad (\text{SI3-5})$$

To strengthen the justification of  $T$  as delay time for the exponential function  $y(t) = 1 - \exp(ct) = 1 - q^t$  with  $c = \ln(q)$ , it is useful to consider the power-law case

$y(t) = ct^q$ . Here, the ratio  $\frac{y}{\dot{y}}$  with  $T = q$  functions as a linearizer such that  $\frac{y - \dot{y}}{\dot{y}} b = a(t - T)$

$\Leftrightarrow \frac{y - \dot{y}}{\dot{y}} = \frac{1}{T}(t - T)$ ; where  $b = aT$  is the intercept,  $T = \frac{\dot{y}}{y} t$  is the intersection with the time

axis, and the difference  $t - T$  can be expressed as well as weighted ( $w$ ) (or moving weighted)

average  $(t - T) = \sum_{i=0}^{k-1} w_{k-i} (t - i) / \sum_{i=0}^{k-1} w_{k-i}$ .  $T$  being constant is in line with the finding (not

shown here) that the change in memory can be considered constant backward in time.

Similar for the exponential function  $y(t) = 1 - q^t$ . Here,  $q$  and  $t$  appear mirrored to the power-law case. Nonetheless,  $T$  (reduced by  $T_\infty$ ) in equation (SI3-5) can also be expressed, in principle (i.e., apart from additional factors), by the operation

$$T_{\text{red}} = T - T_{\infty} = \frac{1}{\ln(q)} \frac{\dot{y}}{y} t. \quad (\text{SI3-6})$$

However, despite this agreement, the change in memory described by equation (SI3-6) is exponential over time. Equation (SI3-6) generalizes to  $T - T_{\infty} = \frac{1-\beta}{\beta} \frac{\dot{\sigma} - \alpha \sigma}{\alpha \sigma} t$  in the case of equation (2a).

#### SI4: To equation (4) reflecting the history of the MB

Rewriting equation (4) shows that it reflects the history of the MB:

$$\begin{aligned} S_n &= \frac{q_{\beta}^n - 1}{q_{\beta} - 1} = \frac{1}{q_{\beta} - 1} \left\{ (q_{\beta}^n - q_{\beta}^{n-1}) + (q_{\beta}^{n-1} - q_{\beta}^{n-2}) + q_{\beta}^{n-2} - \dots - q_{\beta} + (q_{\beta} - 1) \right\} \\ &= \frac{1}{q_{\beta} - 1} \left\{ q_{\beta}^{n-1} (q_{\beta} - 1) + q_{\beta}^{n-2} (q_{\beta} - 1) + \dots + q_{\beta}^0 (q_{\beta} - 1) \right\} = \sum_{i=0}^{n-1} q_{\beta}^i = \text{Past} \end{aligned} \quad (\text{SI4-1})$$

#### SI5: To monitoring $\ln(M \cdot P)$

According to equations (3)–(5):

$$M_{\infty} = \frac{1}{1 - q_{\beta}} = \frac{T_{\infty}}{q_{\beta}} \quad \text{and} \quad P_{\infty} = \frac{1}{T_{\infty}}. \quad (\text{SI5-1,2})$$

Hence:

$$\frac{1}{M_{\infty} P_{\infty}} = q_{\beta} = \exp \left( - \left( \frac{K}{D} + \alpha \right) \Delta t \right) = \exp \left( - \frac{K}{D} \beta \Delta t \right) \Leftrightarrow \ln(M_{\infty} P_{\infty}) = \frac{K}{D} \beta \Delta t = \lambda_{\beta} = \lambda \beta$$

with  $q_{\beta}$  and  $q$  as defined under Methods, and  $\lambda_{\beta} = \lambda \beta$  with  $\lambda = \frac{K}{D} \Delta t$ . Thus, the ratio  $\frac{\lambda}{\ln(MP)}$

allows indicating how much smaller the system's natural rate of change in the numerator turns out compared to the system's rate of change in the denominator under continued increase in stress. This gradual build-up relative to  $\lambda$  (with  $K/D$  constant) is limited by  $\beta^{-1}$ .

**SI6: Overview of data and conversion factors****Tab. SI6-1:** Overview of the data used in the paper. All data refer to the global scale (or are assumed to be globally representative).

| Data                                                                                                  | Source                                               | Time range             | Brief description                                                                                                                                                           |
|-------------------------------------------------------------------------------------------------------|------------------------------------------------------|------------------------|-----------------------------------------------------------------------------------------------------------------------------------------------------------------------------|
| Atmospheric CO <sub>2</sub> concentration (in ppm)                                                    | 2 Degrees Institute, Canada <sup>2</sup>             | 1750–1955              | Ice core data (75-year smoothed); Law Dome, Antarctica                                                                                                                      |
|                                                                                                       |                                                      | 1959–1979              | Atmospheric measurements (annual means); Mouna Loa, Hawaii                                                                                                                  |
|                                                                                                       | Global Monitoring Laboratory, NOAA, USA <sup>3</sup> | 1980–2018              |                                                                                                                                                                             |
| CO <sub>2</sub> emissions from fossil-fuel combustion and cement production (in PgC y <sup>-1</sup> ) | Global Carbon Project <sup>4</sup>                   | 1751–1958              | Global estimates derived from energy statistics by nation and year                                                                                                          |
|                                                                                                       |                                                      | 1959–2015              |                                                                                                                                                                             |
| Land-use change emissions (in PgC y <sup>-1</sup> )                                                   |                                                      | 1850–1958              | Global mean values derived from multiple models                                                                                                                             |
|                                                                                                       |                                                      | 1959–2015              |                                                                                                                                                                             |
| Net primary production (in PgC y <sup>-1</sup> )                                                      | O'Sullivan et al. (2019) <sup>5</sup>                | 1900–2016              | Model-based global mean values (Community Land Model; CLIM4.5-BGC)                                                                                                          |
| Dissolved organic carbon (in $\mu\text{mol kg}^{-1}$ )                                                | Bates et. al. (2014) <sup>6</sup>                    | 1983–2012 (max. range) | Shipboard observations (annual means); from 7 sites (2 in the subpolar North Atlantic and 5 in the tropical/subtropical/temperate waters of the North Atlantic and Pacific) |

**Tab. SI6-2:** Overview of the conversion factors used in the paper.

| From                 | to              | Value    | Unit                                    | Source                                                          |
|----------------------|-----------------|----------|-----------------------------------------|-----------------------------------------------------------------|
| C                    | CO <sub>2</sub> | 3.664    | gCO <sub>2</sub> (gC) <sup>-1</sup>     | CDIAC (2012: Tab. 3) <sup>7</sup>                               |
| ppmv CO <sub>2</sub> | PgC             | 2.120    | PgC ppmv <sup>-1</sup>                  | Ciais et al. (2014: Tab. 6.1) <sup>8</sup>                      |
| ppmv CO <sub>2</sub> | Pa              | 0.101325 | Pa (10 <sup>6</sup> ppmv) <sup>-1</sup> | CDIAC (2012: Tab. 3) <sup>7</sup> and Dalton's law <sup>9</sup> |

**SI7: Use of equation (9) to estimate the photosynthetic carbon flux ratio  $\Delta\text{Ph}_i/\text{Ph}$** 

The leaf-level factor  $L$  denotes the relative leaf photosynthetic response to a 1 ppmv change in the atmospheric concentration of CO<sub>2</sub>. The photosynthetic limits  $L_1$  (photosynthesis limited by electron transport) and  $L_2$  (photosynthesis limited by rubisco activity) are determined by using equations (7) and (9) in Luo et al. (1996).<sup>10</sup>

We follow equation (9) to derive the photosynthetic carbon flux ratio  $\Delta\text{Ph}_i/\text{Ph}$  by the change in  $L_i$ , which we describe by means of a geometric sequence (with the common ratio  $1 - q_{L_i}$ ). We demonstrate the quality of this approximation by comparing our results (to the extent possible) with those cited by Luo et al. (1996). Dropping index  $i$ :

$$\begin{aligned}
& L_{\text{high}} - L_{\text{low}} \\
& = \Delta L = L_{\text{high}} + L_{\text{high}} (1 - q_L) + \dots + L_{\text{high}} (1 - q_L)^{(\Delta \text{CO}_2 - 1)} \quad (\text{SI7-1}) \\
& = L_{\text{high}} \sum_{k=0}^{\Delta \text{CO}_2 - 1} (1 - q_L)^k = L_{\text{high}} \frac{1 - (1 - q_L)^{\Delta \text{CO}_2}}{1 - (1 - q_L)}
\end{aligned}$$

where  $q_L = \Delta L / (L_{\text{high}} \Delta \text{CO}_2)$ . (We follow the authors and express  $L_i$  in units of % [and not in % ppmv<sup>-1</sup>]. To express  $q_L$  in units of 1, we consider  $\Delta \text{CO}_2$  dimensionless [equivalent to multiplying  $\Delta \text{CO}_2$  with ppmv<sup>-1</sup>].) The term  $L_{\text{high}}$  has to be replaced by the term  $L_{\text{high}} f_{\text{ppm}}$  if  $\Delta L$  is not calculated per 1-ppmv step but per 1-year step (when the change in ppmv is not necessarily 1 ppmv; see also SD1). With the values in Table SI7-1, equation (SI7-1) allows  $\Delta L_i$  values to be derived which can be compared with the  $\Delta \text{Ph}_i / \text{Ph}$  values reported by Luo et al. (1996) in their Table 1.<sup>10</sup> The agreement is sufficient for our purposes (Tab. SI7-2).

**Tab. SI7-1:** Limits of the relative leaf photosynthetic response to a 1 ppm change in the atmospheric concentration of  $\text{CO}_2$  using equations (7) and (9) in Luo et al. (1996).

| Time          | $\text{CO}_2$ | $L_1$  | $L_2$  |
|---------------|---------------|--------|--------|
| y             | ppmv          | %      | %      |
| preindustrial | 280           | 0.1827 | 0.3520 |
| 1958          | 315           | 0.1457 | 0.2969 |
| 1992          | 355.5         | 0.1155 | 0.2495 |
| 1993          | 357           | 0.1146 | 0.2479 |

**Tab. SI7-2:** Comparison of  $\Delta L_i$  derived with equation (SI7-1) with  $\Delta \text{Ph}_i / \text{Ph}$  as listed in Table 1 in Luo et al. (1996).

| Period             | $\Delta \text{CO}_2$ | $q_{L1}$ | $q_{L2}$ | $\Delta L_1$ | $\Delta L_2$ | $\Delta \text{Ph}_i / \text{Ph}$ |
|--------------------|----------------------|----------|----------|--------------|--------------|----------------------------------|
| y                  | ppmv                 | 1        | 1        | %            | %            | %                                |
| 1992–1993          | 1.5                  | 0.005358 | 0.004031 | 0.17         | 0.37         | 0.17–0.37                        |
| 1958–1993          | 42                   | 0.005080 | 0.003929 | 5.6          | 11.5         | 5.6–12.1                         |
| preindustrial–1993 | 77                   | 0.004839 | 0.003840 | 11.8         | 23.5         | 11.8–25.5                        |

### SI8: The compression module referring to a tropospheric expansion of 20 m (standard atmosphere)

The standard atmosphere assigns a temperature gradient of  $-6.5 \text{ }^\circ\text{C}/1000 \text{ m}$  up to the tropopause at 11 km. The isentropic coefficient of expansion  $\gamma$  varies with temperature and atmospheric  $\text{CO}_2$  concentration:  $\gamma$  increases with decreasing  $T$  and decreases with increasing atmospheric  $\text{CO}_2$ .<sup>11</sup> However, in the case of dry air and no change in its chemical composition, the compression module  $K_{\text{ad}}$  can be expected to stay constant. Here we provide an overview of the

altitudes different isentropic coefficients of expansion refer to assuming a tropospheric expansion of 20 m;<sup>12,13</sup> and, thereupon, determine  $K_{ad}$ .

Combining equations (19) and (20b):

$$K_{ad} = \gamma p = -\frac{\Delta p}{\Delta V/V} \quad (\text{SI8-1})$$

where the difference in pressure for a difference in altitude  $\Delta h = h_2 - h_1$  is given by

$$\Delta p = p_2 - p_1 = p_0 \left[ \left( 1 - a(h_1 + \Delta h) \right)^b - \left( 1 - a h_1 \right)^b \right]$$

according to equation (7) in Cavcar (2000)<sup>14</sup> with  $p_0 = 1013.25 \text{ hPa}$ ,  $a = 0.0065/T_0$ ,  $T_0 = 288.15 \text{ K}$ ,  $b = 5.2561$  and  $h$  the altitude in units of meter;

and the difference in volume by

$$\frac{\Delta V}{V} = \frac{V_2 - V_1}{V_1 - V_{\text{Earth}}} = \frac{(r_{\text{Earth}} + (h_1 + \Delta h)/1000)^3 - (r_{\text{Earth}} + h_1/1000)^3}{(r_{\text{Earth}} + h_1/1000)^3 - r_{\text{Earth}}^3}$$

with  $r_{\text{Earth}} = 6371 \text{ km}$ .

Letting  $p$  refer to  $p_1$  in equation (SI8-1) and solving for  $\gamma$ :

$$\gamma = \frac{1 - \left\{ \left( 1 - a(h_1 + \Delta h) \right) / \left( 1 - a h_1 \right) \right\}^b}{\Delta V/V} \quad (\text{SI8-2})$$

Setting  $\Delta h = 20 \text{ m}$  in agreement with observations, equation (SI8-2) allows calculating  $\gamma$  in dependence of  $h_1$  (see Tab. SI8-1). As can also be seen from the table, the value of  $K_{ad}$  ranges between 400 and 412 hPa.

**Tab. SI8-1:** Standard atmosphere: isentropic coefficient of expansion  $\gamma$  and compression module  $K_{ad}$  for a tropospheric expansion of 20 m at different altitudes.

| $h_1$  | $\gamma$    | $p_1$                    | $K_{ad}$    |
|--------|-------------|--------------------------|-------------|
| m      | 1           | hPa                      | hPa         |
| Input  | Eq. (SI8-2) | Eq. (7) in Cavcar (2000) | Eq. (SI8-1) |
| 7,100  | 1.000       | 404.8                    | 404.8       |
| 7,685  | 1.100       | 372.5                    | 409.6       |
| 8,255  | 1.200       | 343.0                    | 411.6       |
| 8,810  | 1.300       | 316.2                    | 411.1       |
| 8,865  | 1.310       | 313.6                    | 411.0       |
| 9,345  | 1.400       | 292                      | 408.8       |
| 9,360  | 1.403       | 291.3                    | 408.7       |
| 9,865  | 1.500       | 269.9                    | 404.9       |
| 10,370 | 1.600       | 249.7                    | 399.6       |

**SI9: Equation (1a) with strain given by a second-order polynomial**

We start from  $\varepsilon(t) = c_2 t^2 + c_1 t$ . Inserting  $\dot{\varepsilon}(t) = 2c_2 t$  into equation (1a) with  $\sigma(0) = 0$  and

$$\int x e^{cx} dx = e^{cx} \frac{cx - 1}{c^2} :^{15}$$

$$\begin{aligned} \sigma(t) &= K \int_0^t \dot{\varepsilon}(\tau) \exp\left(\frac{K}{D}(\tau - t)\right) d\tau = 2c_2 K \exp\left(-\frac{K}{D}t\right) \int_0^t \tau \exp\left(\frac{K}{D}\tau\right) d\tau \\ &= 2c_2 K \exp\left(-\frac{K}{D}t\right) \left\{ \exp\left(\frac{K}{D}\tau\right) \frac{\frac{K}{D}\tau - 1}{\left(\frac{K}{D}\right)^2} \right\}_0^t = 2c_2 K \exp\left(-\frac{K}{D}t\right) \left\{ \exp\left(\frac{K}{D}t\right) \frac{\frac{K}{D}t - 1}{\left(\frac{K}{D}\right)^2} + \frac{1}{\left(\frac{K}{D}\right)^2} \right\} \\ &= 2c_2 \frac{D^2}{K} \left\{ \frac{K}{D}t - 1 + \exp\left(-\frac{K}{D}t\right) \right\} \xrightarrow{t \rightarrow \infty} 2c_2 D \left( t - \frac{D}{K} \right) \end{aligned}$$

**SI10: Overview of parameters in experiments B and C**

Table SI10-1 provides an overview of the parameters which result from the set of stress and strain explicit experiments B and C. They can be understood as a repetition of the 1959–2015 Case 0 experiment (see A.1 in the Results section), but with the difference that now upstream emissions as of 1900 (B) or 1850 (C), respectively, are considered; thus allowing initial conditions for 1959 other than zero as in the Case 0 experiment to be taken into account:

Case 0: 1959–2015

B: 1900–1958 (upstream emissions), 1959–2015

C: 1850–1958 (upstream emissions), 1959–2015.

The experiments are ordered consecutively in term of time. By way of contrast, Table SI10-2 comprises the parameters of the three 1959–2015 periods in the form of min–max intervals. Except for the exponential growth factor  $\alpha$ , these intervals are dominated by Case 0 and B (1959–2015) parameters (as shown by the background color of the cells); mirroring the fact that we had difficulties with describing the entire upstream period 1850–1958 by means of a single exponential growth factor ( $0.0151 \text{ y}^{-1}$ ).

Nonetheless, Table SI10-2 allows drawing a number of robust results:

- The compression modulus  $K$  increased between 1850 and 1959–2015 from  $\sim 2$  to  $10\text{--}13 \text{ Pa}$  (the atmosphere became less compressible);
- while the damping constant  $D$  decreased between 1850 and 1959–2015 from  $\sim 468$  to  $459\text{--}462 \text{ Pa y}$  (land and oceans became less viscous);
- with the consequence that the ratio  $\lambda = K/D$  increased between 1850 and 1959–2015 from  $\sim 0.004\text{--}0.005 \text{ y}^{-1}$  to  $0.021\text{--}0.028 \text{ y}^{-1}$  (i.e., by a factor of 4 to 6).



- Delay time  $T_\infty$  decreased (hence persistence  $P_\infty$  increased) between 1850 and 1959–2015 from ~51 (~0.02) to 18–21 (0.047–0.055) on the dimensionsless time scale;
- while memory  $M_\infty$  decreased between 1850 and 1959–2015 from ~52 to 19–22 on the dimensionsless time scale.

**Tab. SI10-1:** Overview of parameters in experiments B and C.

| Parameters                        |                 | Case 0          | B         |           | C         |           |
|-----------------------------------|-----------------|-----------------|-----------|-----------|-----------|-----------|
|                                   |                 | 1959–2015       | 1900–1958 | 1959–2015 | 1850–1958 | 1959–2015 |
|                                   |                 | stress explicit |           |           |           |           |
| $\sigma(0)$                       | Pa              | 0               | 0         | 5.8       | 0         | 7.8       |
| <b>K</b>                          | Pa              | 9.9             | 2.4       | 12.7      | 2.1       | 11.6      |
| <b>D</b>                          | Pa y            | 461.5           | 467.7     | 459.2     | 467.9     | 460.1     |
| $\lambda^{a,b}$                   | $y^{-1}$        | 0.0214          | 0.0051    | 0.0276    | 0.0045    | 0.0253    |
| $\lambda^{-1}$                    | y               | 46.8            | 196.3     | 36.3      | 223.5     | 39.6      |
| $\alpha^a$                        | $y^{-1}$        | 0.0247          | 0.0228    | 0.0262    | 0.0151    | 0.0281    |
| $\beta$                           | 1               | 2.158           | 5.475     | 1.951     | 4.371     | 2.112     |
| $\lambda_\beta^a$                 | $y^{-1}$        | 0.0461          | 0.0279    | 0.0538    | 0.0196    | 0.0533    |
| $\lambda_\beta^{-1}$              | y               | 21.7            | 35.9      | 18.6      | 51.1      | 18.7      |
| $q_\beta$                         | 1               | 0.9549          | 0.9725    | 0.9476    | 0.9806    | 0.9481    |
| $T_\infty$                        | 1               | 21.2            | 35.4      | 18.1      | 50.6      | 18.3      |
| $M_\infty$<br>$=T_\infty/q_\beta$ | 1               | 22.2            | 36.4      | 19.1      | 51.6      | 19.3      |
| $P_\infty$<br>$=1/T_\infty$       | 1               | 0.0472          | 0.0283    | 0.0553    | 0.0197    | 0.0548    |
| $\lambda/\lambda_\beta = 1/\beta$ | %               | 46.3            | 18.3      | 51.3      | 22.9      | 47.3      |
| <b>SUMXMY2</b>                    | Pa <sup>2</sup> | 1.400           | 1.399     | 21.000    | 1.100     | 60.902    |
| strain explicit                   |                 |                 |           |           |           |           |
| $\varepsilon(0)$                  | 1               | 0               | 0         | 2.5       | 0         | 4.3       |
| $\alpha^a$                        | $y^{-1}$        | 0.0247          | 0.0214    | 0.0257    | 0.0162    | 0.0270    |

<sup>a</sup> Given in  $y^{-1}$ .<sup>b</sup> Derived for K and D deviating from their respective mean values equally in relative terms.

**Tab. SI10-2:** Like Table SI10-1; with the difference that Table SI10-2 comprises the parameters of the three 1959–2015 periods in terms of a min-max interval. The background colors of the cells in Table SI10-1 are preserved.

| Parameters                         |                 | C               | B         | Min–Max: Case 0 and B and C |        |
|------------------------------------|-----------------|-----------------|-----------|-----------------------------|--------|
|                                    |                 | 1850–1958       | 1900–1958 | 1959–2015                   |        |
|                                    |                 | stress explicit |           |                             |        |
| $\sigma(0)$                        | Pa              | 0               | 0         | ---                         | ---    |
| K                                  | Pa              | 2.1             | 2.4       | 9.9                         | 12.7   |
| D                                  | Pa y            | 467.9           | 467.7     | 459.2                       | 461.5  |
| $\lambda^{a,b}$                    | y <sup>-1</sup> | 0.0045          | 0.0051    | 0.0214                      | 0.0276 |
| $\lambda^{-1}$                     | y               | 223.5           | 196.3     | 36.3                        | 46.8   |
| $\alpha^a$                         | y <sup>-1</sup> | 0.0151          | 0.0228    | 0.0247                      | 0.0281 |
| $\beta$                            | 1               | 4.371           | 5.475     | 1.951                       | 2.158  |
| $\lambda_\beta^a$                  | y <sup>-1</sup> | 0.0196          | 0.0279    | 0.0461                      | 0.0538 |
| $\lambda_\beta^{-1}$               | y               | 51.1            | 35.9      | 18.6                        | 21.7   |
| $q_\beta$                          | 1               | 0.9806          | 0.9725    | 0.9476                      | 0.9549 |
| $T_\infty$                         | 1               | 50.6            | 35.4      | 18.1                        | 21.2   |
| $M_\infty$<br>= $T_\infty/q_\beta$ | 1               | 51.6            | 36.4      | 19.1                        | 22.2   |
| $P_\infty$<br>= $1/T_\infty$       | 1               | 0.0197          | 0.0283    | 0.0472                      | 0.0553 |
| $\lambda/\lambda_\beta=1/\beta$    | %               | 22.9            | 18.3      | 46.3                        | 51.3   |
| SUMXMY2                            | Pa <sup>2</sup> | 1.100           | 1.399     | ---                         | ---    |
|                                    |                 |                 |           |                             |        |
|                                    |                 | strain explicit |           |                             |        |
| $\varepsilon(0)$                   | 1               | 0               | 0         | ---                         | ---    |
| $\alpha^a$                         | y <sup>-1</sup> | 0.0162          | 0.0214    | 0.0247                      | 0.0270 |

**Acronyms**

|                       |                                                                                                          |
|-----------------------|----------------------------------------------------------------------------------------------------------|
| ad                    | adiabatic                                                                                                |
| CO <sub>2</sub>       | atmospheric CO <sub>2</sub> concentration (in ppmv)                                                      |
| D                     | damping constant (in Pa y)                                                                               |
| DIC                   | dissolved inorganic carbon (in $\mu\text{mol kg}^{-1}$ )                                                 |
| E                     | Young's modulus (in Pa)                                                                                  |
| GHG                   | greenhouse gas                                                                                           |
| h                     | altitude (in m)                                                                                          |
| it                    | isothermal                                                                                               |
| K                     | compression modulus (in Pa)                                                                              |
| L                     | land (index)                                                                                             |
| L                     | leaf-level factor (in ppmv <sup>-1</sup> )                                                               |
| M                     | memory (in units of 1)                                                                                   |
| MB                    | Maxwell body                                                                                             |
| n.a.                  | not assessable                                                                                           |
| NPP                   | net primary production (in PgC y <sup>-1</sup> )                                                         |
| O                     | oceans                                                                                                   |
| p                     | atmospheric pressure (in hPa)                                                                            |
| pCO <sub>2</sub>      | atmospheric CO <sub>2</sub> concentration (in $\mu\text{atm}$ )                                          |
| P                     | persistence (in y <sup>-1</sup> )                                                                        |
| Ph                    | photosynthetic carbon flux (in PgC y <sup>-1</sup> )                                                     |
| q                     | auxiliary quantity (in units of 1)                                                                       |
| red                   | reduced                                                                                                  |
| R                     | Revelle (buffer) factor (in units of 1)                                                                  |
| SD                    | supplementary data                                                                                       |
| SE                    | sensitivity experiment                                                                                   |
| SI                    | supplementary information                                                                                |
| t                     | time (in y)                                                                                              |
| T                     | time delay (in units of 1)                                                                               |
| TOA                   | top of the atmosphere                                                                                    |
| T <sub>∞</sub>        | time delay for $t \rightarrow \infty$ (in units of 1)                                                    |
| w                     | weight(ed)                                                                                               |
| $\alpha$              | exponential growth factor of the strain (in y <sup>-1</sup> )                                            |
| $\alpha_{\text{ppm}}$ | exponential growth factor of the atmospheric CO <sub>2</sub> concentration (in y <sup>-1</sup> )         |
| $\beta$               | auxiliary quantity (in units of 1)                                                                       |
| $\beta_b$             | biotic growth factor (in units of 1)                                                                     |
| $\beta_{\text{Ph}}$   | photosynthetic beta factor (in units of 1)                                                               |
| $\varepsilon$         | strain (referring to atmospheric expansion by volume and CO <sub>2</sub> uptake by sinks; in units of 1) |
| $\gamma$              | isentropic coefficient of expansion (in units of 1)                                                      |
| $\kappa$              | compressibility (in Pa <sup>-1</sup> )                                                                   |

|            |                                                       |
|------------|-------------------------------------------------------|
| $\sigma$   | stress (atmospheric CO <sub>2</sub> emissions; in Pa) |
| $\sigma_D$ | stress-induced rate of change (in y <sup>-1</sup> )   |

## References

- Wikibooks. Formelsammlung Mathematik: Endliche Reihen. Section 10: Partialsummen der geometrischen Reihe. [https://de.wikibooks.org/wiki/Formelsammlung\\_Mathematik:\\_Endliche\\_Reihen#Partialsummen\\_der\\_geometrischen\\_Reihe](https://de.wikibooks.org/wiki/Formelsammlung_Mathematik:_Endliche_Reihen#Partialsummen_der_geometrischen_Reihe) (last edit 24 November 2019; last access 6 November 2020)
- 2 Degrees Institute. Sechelt BC, Canada. Data sources: <https://www.co2levels.org/#sources>; global atmospheric concentrations of carbon dioxide over time: [https://www.epa.gov/sites/production/files/2016-08/ghg-concentrations\\_fig-1.csv](https://www.epa.gov/sites/production/files/2016-08/ghg-concentrations_fig-1.csv) (last web update April 2016)
- National Oceanic and Atmospheric Administration. Silver Springs MD, United States of America. Global Monitoring Laboratory: <https://www.esrl.noaa.gov/gmd/ccgg/trends/data.html>; Mouna Loa CO<sub>2</sub> annual mean data: [ftp://aftp.cmdl.noaa.gov/products/trends/co2/co2\\_gr\\_mlo.txt](ftp://aftp.cmdl.noaa.gov/products/trends/co2/co2_gr_mlo.txt) (file creation 5 February 2020)
- Global Carbon Project. Carbon budget and trends 2019. (Published on 4 December 2019, along with other original peer-reviewed papers and data sources). Data: [http://www.globalcarbonproject.org/carbonbudget/archive/2016/Global\\_Carbon\\_Budget\\_2016v1.0.xlsx](http://www.globalcarbonproject.org/carbonbudget/archive/2016/Global_Carbon_Budget_2016v1.0.xlsx) (see Worksheet *Historical Budget* for data prior to 1958; Worksheet *Fossil Emissions by Fuel Type*, and Worksheet *Land-Use Change Emissions* for data from 1959 to 2015)
- O’Sullivan, M., Spracklen, D. V., Batterman, S. A., Arnold, S. R., Gloor, M. & Buermann, W. Have synergies between nitrogen deposition and atmospheric CO<sub>2</sub> driven the recent enhancement of the terrestrial carbon sink? *Global Biogeochem. Cycles* **33**, 163–180 (2019). <https://doi.org/10.1029/2018GB005922>; research data repository: <http://archive.researchdata.leeds.ac.uk/482/>
- Bates, N. R., Astor, Y. M., Church, M. J., Currie, K., Dore, J. E., González-Dávila, M., Lorenzoni, L., Muller-Karger, F., Olafsson, J. & Santana-Casiano, J. M. A Time-series view of changing ocean chemistry due to ocean uptake of anthropogenic CO<sub>2</sub> and ocean acidification. *Oceanography* **27**, 126–141 (2014). <https://doi.org/10.5670/oceanog.2014.16>; supporting online material: [https://tos.org/oceanography/assets/images/content/27-1\\_bates\\_supplement.pdf](https://tos.org/oceanography/assets/images/content/27-1_bates_supplement.pdf)
- CDIAC. Carbon Dioxide Information Analysis Center - Conversion Tables. <https://cdiac.ess-dive.lbl.gov/pns/convert.html> (last edit 26 September 2012; last access 10 November 2020)
- Ciais, P., Sabine, C., Bala, G., Bopp, L., Brovkin, V., Canadell, J., Chhabra, A., DeFries, R., Galloway, J., Heimann, M., Jones, C., Le Quéré, C., Myneni, R. B., Piao, S. & Thornton, P. Carbon and Other Biogeochemical Cycles. In: *Climate Change 2013: The Physical Science Basis*. (eds Stocker, T. F., Qin, D., Plattner, G.-K., Tignor, M., Allen, S. K., Boschung, J., Nauels, A., Xia, Y., Bex, V. & Midgley, P. M.) 465–570 (Cambridge University Press, 2013). [http://www.climatechange2013.org/images/report/WG1AR5\\_Chapter06\\_FINAL.pdf](http://www.climatechange2013.org/images/report/WG1AR5_Chapter06_FINAL.pdf)
- Silberberg, Martin S. (2009). *Chemistry: The Molecular Nature of Matter and Change* (McGraw-Hill, 2009). (Background source to [https://en.wikipedia.org/wiki/Dalton%27s\\_law](https://en.wikipedia.org/wiki/Dalton%27s_law))
- Luo, Y. & Mooney, H. A. Stimulation of global photosynthetic carbon influx by an increase in atmospheric carbon dioxide concentration. In: *Carbon Dioxide and Terrestrial Ecosystems*. (eds Koch, G. W. & Mooney, H. A.) 381–397 (Academic Press, 1996).
- Wark, K. *Thermodynamics* (McGraw2Hill, 1983) (Background source to [http://homepages.wmich.edu/~cho/ME432/Appendix1\\_SIunits.pdf](http://homepages.wmich.edu/~cho/ME432/Appendix1_SIunits.pdf); cf. also [https://en.wikipedia.org/wiki/Heat\\_capacity\\_ratio](https://en.wikipedia.org/wiki/Heat_capacity_ratio))
- Lackner, B. C., Steiner, A. K., Hegerl, G. C. & Kirchengast, G. Atmospheric climate change detection by radio occultation using a fingerprinting method. *J. Climate* **24**, 5275–5291 (2011). <https://doi.org/10.1175/2011JCLI3966.1>
- Steiner, A. K., Lackner, B. C., Ladstädter, F., Scherllin-Pirscher, B., Foelsche, U. & Kirchengast, G. GPS radio occultation for climate monitoring and change detection. *Radio Sci.* **46**, RS0D24 (17pp) (2011). <https://doi.org/10.1029/2010RS004614>

14. Cavcar, M. The international standard atmosphere (ISA). Anadolu University, Turkey (7pp) (2000). <http://fisicaatmo.at.fcen.uba.ar/practicas/ISAweb.pdf>
15. Wikipedia. List of integrals of exponential functions. [https://en.wikipedia.org/wiki/List\\_of\\_integrals\\_of\\_exponential\\_functions](https://en.wikipedia.org/wiki/List_of_integrals_of_exponential_functions) (last edit 14 October 2020; last access 07 December 2020)
